# Supplementary material for: Neurovascular Interaction Promotes the Morphological and Functional Maturation of Cortical Neurons
Source: PubMed Central journal article supplement (PMC5605567; doi:10.3389/fncel.2017.00290), 2017-09-15
Supplement: Image_1.pdf [file Image_1.pdf]

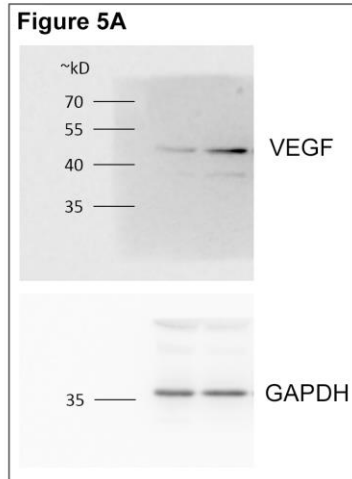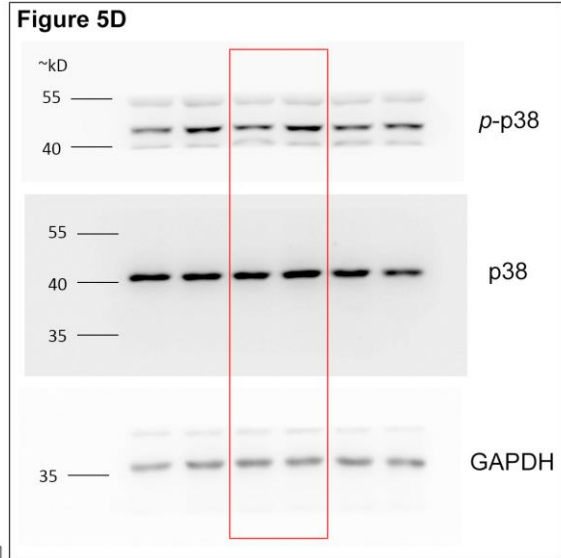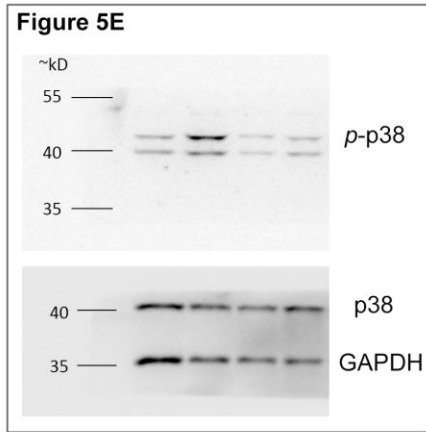

**Supplementary Figure 1. The original images of blots in Figure 5.**
